# Supplementary material
Source: publisher figshare collection journal article supplement (https://sage.figshare.com/ndownloader/files/44599316)
Supplement: Supplementary file 1 [file 44599316]

**ICU Patient Family Stress Recovery During Breaks in a Hospital Garden and Indoor Environments**

**Authors:** Ulrich, R.S.; Cordoza, M.; Gardiner, S.K.; Manulik, B.J.; Fitzpatrick, P.S.; Hazen, T.M.; Perkins, R.S.

**Course ID #** HERD81-A

| Full Name | AIA # / EDAC # | Email | Phone # |
|-----------|----------------|-------|---------|
|           |                |       |         |

**Learning Objective 1:** Readers will understand that families of patients in an ICU experience stress.

**Learning Objective 2:** Readers will understand that stress reduction for ICU families varies with the environments in which they take breaks.

**Learning Objectives 3:** Readers will understand that appropriate research methods allow investigators to compare the efficacy of different environments in reducing stress for ICU families.

**Learning Objective 4:** Readers will understand that gardens and natural environments have a strong potential for stress reduction in ICU families.

**Question 1:** The authors conclude with a recommendation. It is for:

- a. Providing a zen garden of stones, moss, and water outside every ICUE possible.
- b. Creating an unlocked garden with abundant nature located close to an ICU.
- c. Creating a respite space for ICU families with indoor plants, nature photos and sounds.
- d. Improving the quality of indoor settings where families get a break from the ICU.

**Question 2:** The research method employed in this study is?

- a. Field observation of family members while in a garden near the ICU.
- b. Administration of a validated survey instrument before and after a visit to a break location.
- c. Interviews with family members before and after a visit to a break location.
- d. Responses to an online patient satisfaction survey after the patients was discharged.

**Question 3:** Sadness reduction for ICU families after time in a garden, compared to time indoors is greater and statistically significant.

- a. True
- b. False

To earn AIA continuing education units please complete form, and email Jill Glaser at [jglaser@healthdesign.org](mailto:jglaser@healthdesign.org) and your credits will be uploaded to your AIA account. To earn EDAC continuing education units please complete the form, retain the form for your records and self-submit the credits at the time of your EDAC renewal. The form is your "proof of attendance."
